# Supplementary material for: Modification of boron-doped diamond electrodes with gold–palladium nanoparticles for an oxygen sensor
Source: Royal Society of Chemistry journal article supplement (doi:10.1039/d0an02414g), 2021-01-01
Supplement: d0an02414g1.pdf [file d0an02414g1.pdf]

ARTICLE

## Modification of boron-doped diamond electrode with gold-palladium nanoparticles for an application in an oxygen sensor

Tribidasari A. Ivandini,<sup>1\*</sup> Muhammad S. P. Luhur,<sup>1</sup> Munawar Khalil,<sup>1</sup> and Yasuaki Einaga<sup>2</sup>

Received 00th January 20xx,  
Accepted 00th January 20xx

DOI: 10.1039/x0xx00000x

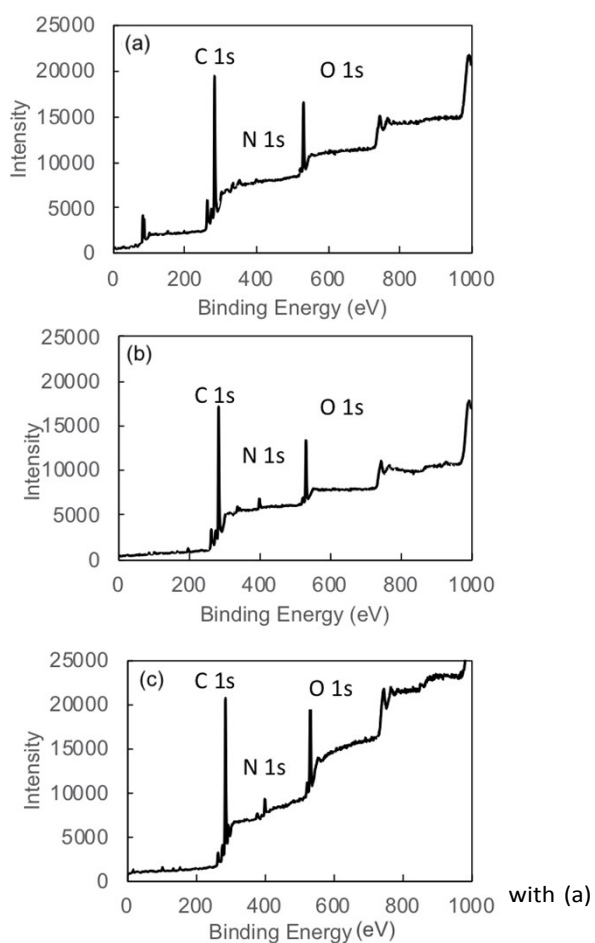

ESI 1. :  
AuNP,

<sup>1</sup>Department of Chemistry, Faculty of Mathematics and Natural Sciences (FMIPA), Universitas Indonesia, Depok 16424, Indonesia.

<sup>2</sup>Dept. of Chemistry, Faculty of Science and Technology, Keio University, Hiyoshi 3-14-1, Yokohama 223-8522, Japan

† Footnotes relating to the title and/or authors should appear here.  
Electronic Supplementary Information (ESI) available: [details of any supplementary information available should be included here]. See DOI: 10.1039/x0xx00000x
